# Supplementary material for: pH-Sensitive Nanoparticles for Colonic Delivery Anti-miR-301a in Mouse Models of Inflammatory Bowel Diseases
Source: MDPI journal article supplement (doi:10.3390/nano13202797), 2023-10-20
Supplement: s1 [file s1]

## Supplementary information

### pH-Sensitive Nanoparticles for Colonic Delivery Anti-miR-301a in Mice Models of Inflammatory Bowel Diseases

Junshan Wang <sup>1,\*</sup>, Min Yao <sup>2</sup>, Jiafeng Zou <sup>2</sup>, Wenxing Ding <sup>2</sup>, Mingyue Sun <sup>2</sup>, Ying Zhuge <sup>3</sup> and Feng Gao <sup>2,4,5,6,\*</sup>

<sup>1</sup> Department of Gastroenterology, Chongming Branch of Shanghai Tenth People's Hospital, Tongji University School of Medicine, Shanghai 202157, China

<sup>2</sup> Shanghai Frontier Science Research Base of Optogenetic Techniques for Cell Metabolism, School of Pharmacy, East China University of Science and Technology, Shanghai 200237, China; ym1584007995@163.com (M.Y.); zoujiafeng2019@126.com (J.Z.); dwx150120413@gmail.com (W.D.); 17854280576@163.com (M.S.)

<sup>3</sup> Department of Cardiology, Shanghai General Hospital, Shanghai Jiao Tong University School of Medicine, Shanghai 200025, China; yiliaobangzu@163.com

<sup>4</sup> Shanghai Key Laboratory of New Drug Design, School of Pharmacy, East China University of Science and Technology, Shanghai 200237, China

<sup>5</sup> Shanghai Key Laboratory of Functional Materials Chemistry, East China University of Science and Technology, Shanghai 200237, China

<sup>6</sup> Optogenetics and Synthetic Biology Interdisciplinary Research Center, State Key Laboratory of Bioreactor Engineering, East China University of Science and Technology, Shanghai 200237, China

\* Correspondence: jswang22@126.com (J.W.); fgao@ecust.edu.cn (F.G.)

## Supplementary Figures

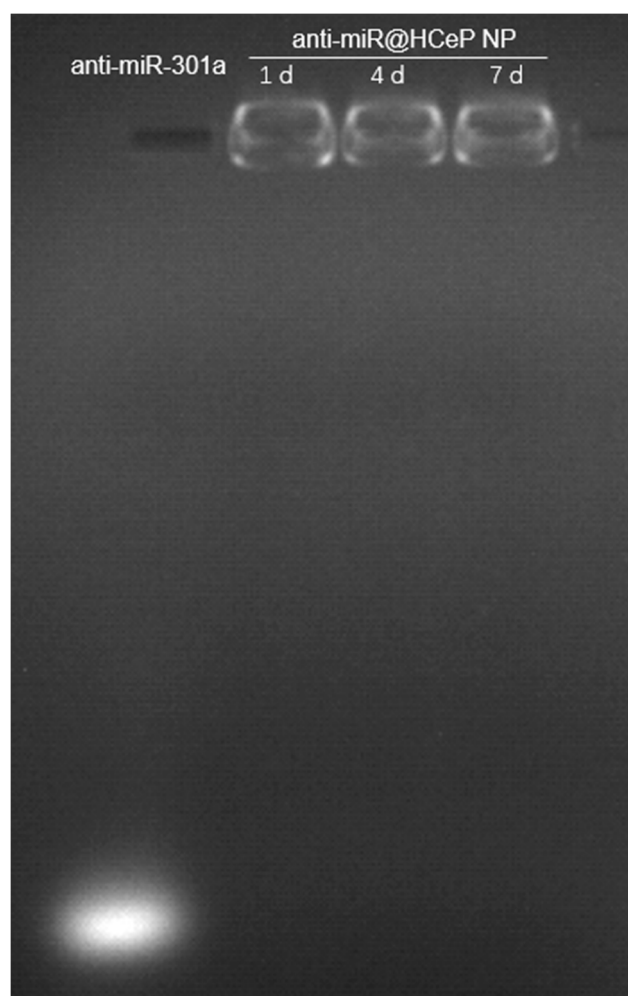

Figure S1. The stability of anti-miR@HCeP NP at 1, 4 and 7 d.

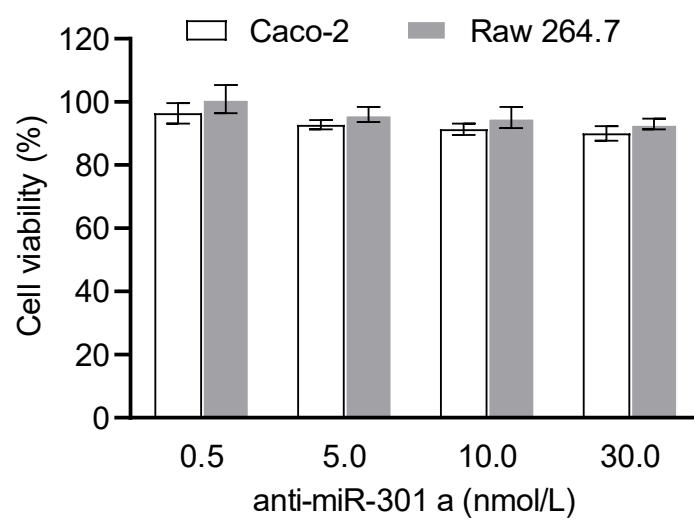

Figure S2. The cell viability of FAM-anti-miR@HCeP NP
